# Supplementary material for: A large-scale brain network mechanism for increased seizure propensity in Alzheimer’s disease
Source: PubMed Central journal article supplement (PMC8382184; doi:10.1371/journal.pcbi.1009252), 2021-08-11
Supplement: pcbi.1009252.s003.pdf [file pcbi.1009252.s003.pdf]

| ROI                           | Abbreviation  | ROI                                | Abbreviation |
|-------------------------------|---------------|------------------------------------|--------------|
| <i>Frontal lobes</i>          |               |                                    |              |
| Superior frontal gyrus        | sup front     | Middle frontal gyrus               | Mid front    |
| Inferior frontal gyrus        | inf front     | Orbital gyrus                      | orbital      |
| Precentral gyrus              | precent       | Paracentral gyrus                  | paracent     |
| <i>Temporal lobes</i>         |               |                                    |              |
| Superior temporal gyrus       | sup temp      | Middle temporal gyrus              | mid temp     |
| Inferior temporal gyrus       | inf temp      | Fusiform gyrus                     | fusiform     |
| Parahippocampal gyrus         | parahipp      | Posterior superior temporal sulcus | post sts     |
| <i>Parietal lobe</i>          |               |                                    |              |
| Superior parietal lobule      | sup parietal  | Inferior parietal lobule           | inf parietal |
| Precuneus                     | precuneus     | Postcentral gyrus                  | postcent     |
| <i>Occipital lobe</i>         |               |                                    |              |
| Medioventral occipital cortex | medvent occip | Lateral occipital cortex           | lat occip    |
| <i>Others</i>                 |               |                                    |              |
| Insular cortex                | insular       | Cingulate cortex                   | cingulate    |
